# Supplementary material for: Investigating the inflammation marker neutrophil-to-lymphocyte ratio in Danish blood donors with restless legs syndrome
Source: PubMed Central journal article supplement (PMC8589184; doi:10.1371/journal.pone.0259681), 2021-11-12
Supplement: pone.0259681.s001.pdf [file pone.0259681.s001.pdf]

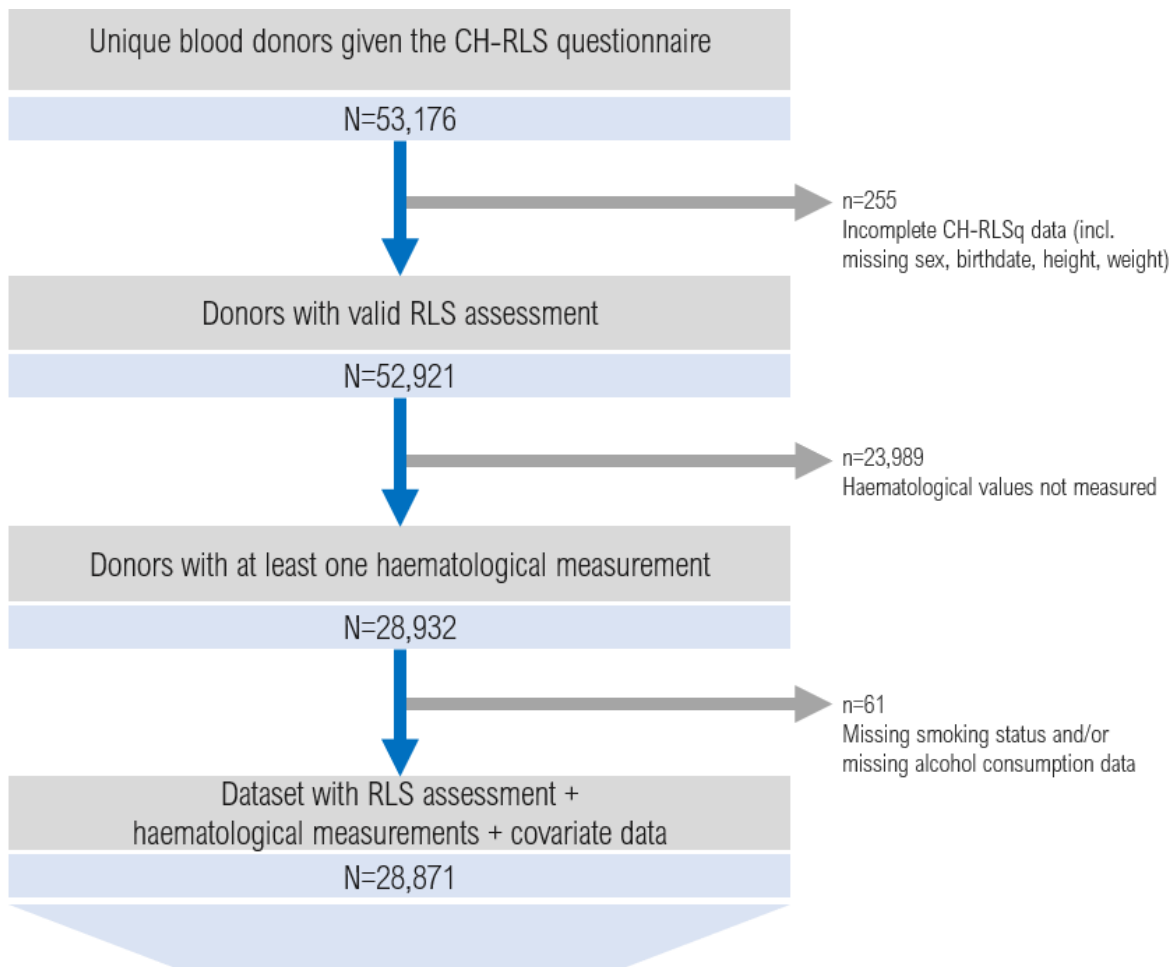

| Marker      | Measured in                |                               | Total N |
|-------------|----------------------------|-------------------------------|---------|
|             | The Central Denmark Region | The Capital Region of Denmark |         |
| WBC         | N=14,356                   | N=14,515                      | 28,871  |
| MCV         | N=14,356                   | N=14,513                      | 28,869  |
| MCHC        | N=14,356                   | N=14,513                      | 28,869  |
| Platelets   | N=14,353                   | N=14,513                      | 28,866  |
| PDW         | N=13,147                   | N=14,477                      | 27,624  |
| PLCR        | N=13,147                   | N=14,477                      | 27,624  |
| Neutrophils | N=13,040                   | N=15                          | 13,055  |
| Lymphocytes | N=13,040                   | N=15                          | 13,055  |

**S1 Fig: Flowchart of the inclusion process.** CH-RLSq = Cambridge Hopkins RLS questionnaire. WBC = white blood cells, MCV = mean corpuscular volume, MCHC = mean corpuscular haemoglobin concentration. PDW = platelet distribution width, PLCR = platelet large cell ratio.
