# Supplementary material for: Investigating the inflammation marker neutrophil-to-lymphocyte ratio in Danish blood donors with restless legs syndrome
Source: PubMed Central journal article supplement (PMC8589184; doi:10.1371/journal.pone.0259681), 2021-11-12
Supplement: pone.0259681.s003.pdf [file pone.0259681.s003.pdf]

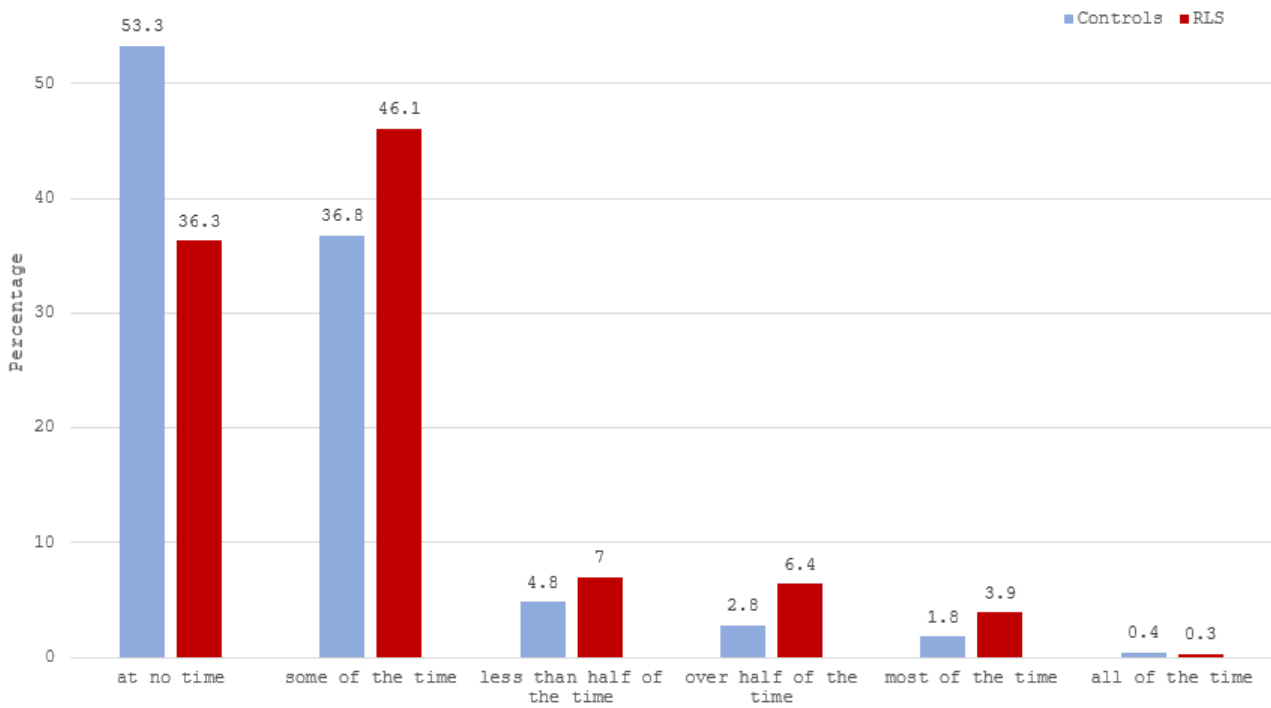

**S3 Fig. Proportion of RLS cases and controls reporting that they have had difficulty sleeping in the two weeks leading up to the donation in the DBDS NLR-RLS dataset, excluding 39 who did not answer the question (N=13,016).**
