# Supplementary material for: Investigating the inflammation marker neutrophil-to-lymphocyte ratio in Danish blood donors with restless legs syndrome
Source: PubMed Central journal article supplement (PMC8589184; doi:10.1371/journal.pone.0259681), 2021-11-12
Supplement: pone.0259681.s005.pdf [file pone.0259681.s005.pdf]

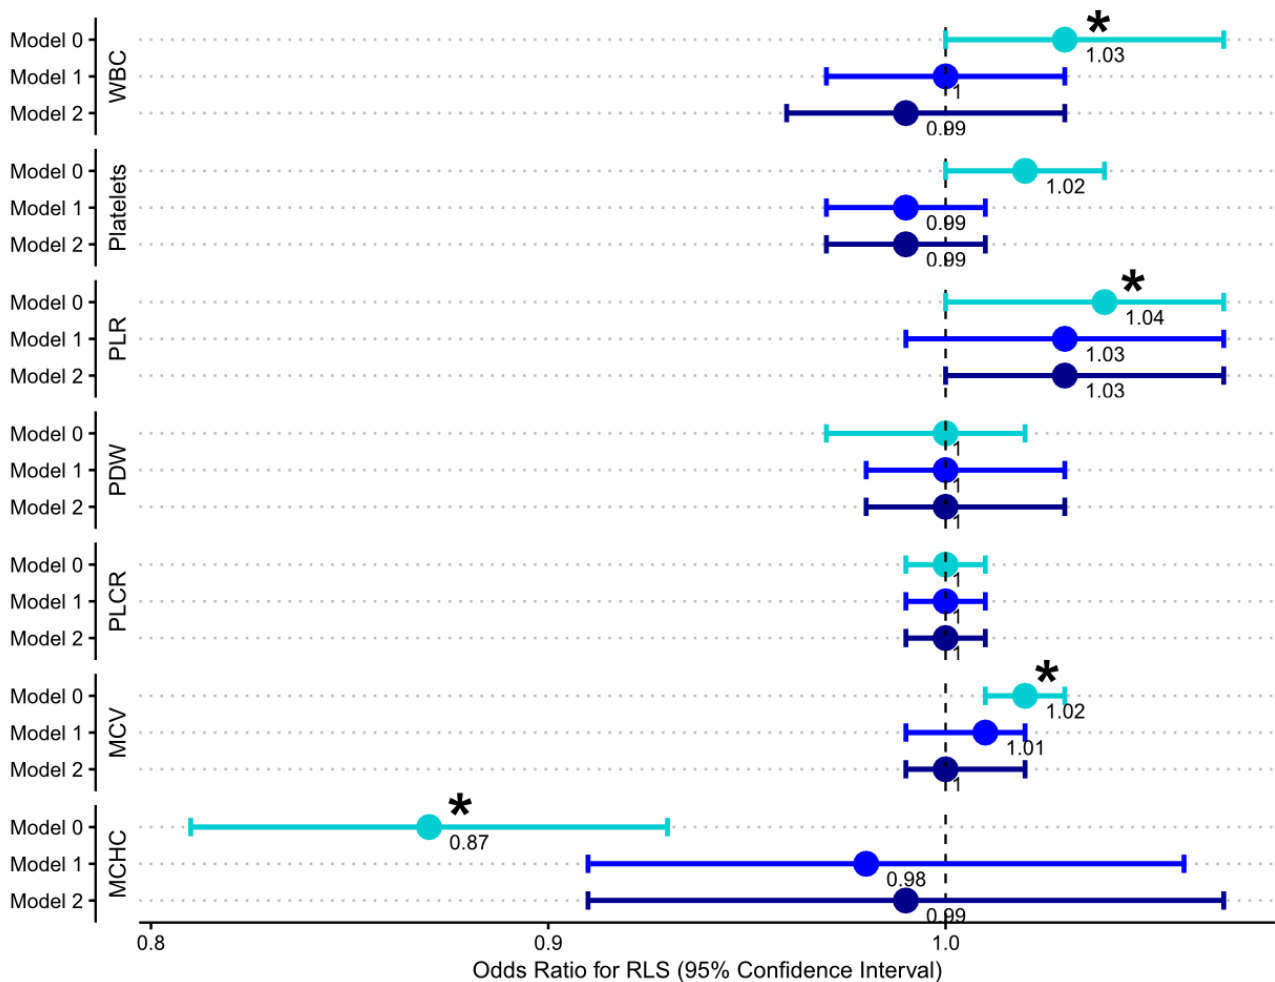

**S5 Fig. Haematological markers as predictors of RLS.** Results from the logistic regression models using seven haematological markers as the predictor variable and RLS status as the outcome in the DBDS cohort. Model 0 = Crude association. Model 1 = adjusting for sex and age. Model 2 = adjusting for sex, age, alcohol consumption, smoking, BMI and region of donation. Data are presented as odd ratios (OR) with 95% confidence intervals and an asterisk (\*) denotes a P value < 0.05. OR for platelets and PLR are for a 20-unit increase. WBC = white blood cells, PLR = platelet-to-lymphocyte ratio, PDW = platelet distribution width, PLCR = platelet large cell ratio, MCV = mean corpuscular volume, MCHC = mean corpuscular haemoglobin concentration.
