# Supplementary material for: Investigating the inflammation marker neutrophil-to-lymphocyte ratio in Danish blood donors with restless legs syndrome
Source: PubMed Central journal article supplement (PMC8589184; doi:10.1371/journal.pone.0259681), 2021-11-12
Supplement: pone.0259681.s007.pdf [file pone.0259681.s007.pdf]

**S2 Table: Descriptive statistics for RLS cases and controls for other haematological markers.**

Demographic descriptive statistics for RLS cases and controls in the Danish Blood Donor Study with other haematological measurements available (N=28,871).

|                                                                                      | Controls<br>N= 27,431     |      | RLS Cases<br>N= 1,440 (5.0%) |      | P value <sup>a</sup> |
|--------------------------------------------------------------------------------------|---------------------------|------|------------------------------|------|----------------------|
|                                                                                      | N                         | %    | N                            | %    |                      |
| <b>Demographic characteristics</b>                                                   |                           |      |                              |      |                      |
| <b>Sex</b>                                                                           |                           |      |                              |      |                      |
| Male                                                                                 | 14,011                    | 51.1 | 550                          | 38.2 | <b>&lt;0.001</b>     |
| Female                                                                               | 13,420                    | 48.9 | 890                          | 61.8 |                      |
| <b>Age</b>                                                                           |                           |      |                              |      |                      |
| median (IQR)                                                                         | 37.6 (27.1-49.6)          |      | 39.7 (28.3-50.3)             |      | <b>&lt;0.001</b>     |
| <b>BMI</b>                                                                           |                           |      |                              |      |                      |
| median (IQR)                                                                         | 24.7 (22.5-27.2)          |      | 24.7 (22.6-27.8)             |      | <b>0.044</b>         |
| <18.5                                                                                | 171                       | 0.6  | 8                            | 0.6  | 0.374                |
| 18.5-25                                                                              | 14,862                    | 54.2 | 760                          | 52.8 |                      |
| 25-30                                                                                | 9,325                     | 34.0 | 484                          | 33.6 |                      |
| 30-35                                                                                | 2,285                     | 8.3  | 142                          | 9.9  |                      |
| 35-40                                                                                | 596                       | 2.2  | 33                           | 2.3  |                      |
| >40                                                                                  | 192                       | 0.7  | 13                           | 0.9  |                      |
| <b>Smoking status</b>                                                                |                           |      |                              |      |                      |
| Non-smoker                                                                           | 23,935                    | 87.3 | 1,226                        | 85.1 | <b>0.034</b>         |
| <1 cigarette per day                                                                 | 1,286                     | 4.7  | 71                           | 4.9  |                      |
| >1 cigarette per day                                                                 | 2,210                     | 8.1  | 143                          | 9.9  |                      |
| <b>Alcohol consumption</b>                                                           |                           |      |                              |      |                      |
| Never/almost never                                                                   | 3,607                     | 13.1 | 182                          | 12.6 | 0.793                |
| A couple of times a month                                                            | 14,378                    | 52.4 | 753                          | 52.3 |                      |
| A couple of times a week                                                             | 8,355                     | 30.5 | 441                          | 30.6 |                      |
| Daily/almost daily                                                                   | 1,091                     | 4.0  | 64                           | 4.4  |                      |
| <b>Region Measured</b>                                                               |                           |      |                              |      |                      |
| Capital Region of Denmark                                                            | 13,801                    | 50.3 | 714                          | 49.6 | 0.590                |
| Region of Central Denmark                                                            | 13,630                    | 49.7 | 726                          | 50.4 |                      |
| <b>Haematological Measurements</b>                                                   |                           |      |                              |      |                      |
| <b>White Blood Cells</b> (N=28,871)<br>10 <sup>9</sup> /L, median (IQR)              | 6.26<br>(5.31-7.39)       |      | 6.38<br>(5.34-7.52)          |      | 0.050                |
| <b>Platelets</b> (N=28,866)<br>10 <sup>9</sup> /L, median (IQR)                      | 240<br>(207-277)          |      | 241<br>(209-280)             |      | 0.059                |
| <b>Platelet-to-Lymphocyte Ratio (PLR)</b><br>(N=13,055)<br>Median (IQR)              | 125.14<br>(103.33-152.40) |      | 126.34<br>(100.00-159.80)    |      | 0.282                |
| <b>Platelet Distribution Width</b> (N=27,624)<br>fL, median (IQR)                    | 13.6<br>(12.4-15.0)       |      | 13.5<br>(12.3-15.1)          |      | 0.627                |
| <b>Platelet Large Cell Ratio</b> (N=27,624)<br>%, median (IQR)                       | 34.5<br>(29.6-39.7)       |      | 34.4<br>(29.6-40.0)          |      | 0.805                |
| <b>Mean Corpuscular Volume</b> (N=28,869)<br>fL, median (IQR)                        | 89.8<br>(87.1-92.5)       |      | 90.0<br>(87.3-93.0)          |      | <b>0.002</b>         |
| <b>Mean Corpuscular Haemoglobin Concentration</b> (N=28,869)<br>mmol/L, median (IQR) | 20.6<br>(20.2-21.1)       |      | 20.6<br>(20.1-21.0)          |      | <b>&lt;0.001</b>     |

<sup>a</sup>For comparison of the two groups, chi-square test was used for categorical variables and Kruskal-Wallis rank test was used for continuous variables.
